# Supplementary material
Source: MDPI journal article supplement (https://www.mdpi.com/2073-4344/13/12/1515)
Supplement: s1 [file s1]

# Novel In Vitro Multienzyme Cascade for Efficient Synthesis of D-tagatose from Sucrose

Shuangyu Liu, Wenyu Tu, Ye Ni, Yuanyi Guo and Ruizhi Han \*

Key Laboratory of Industrial Biotechnology, School of Biotechnology, Jiangnan University, Wuxi 214122, China; 6210201027@stu.jiangnan.edu.cn (S.L.); 6200208048@stu.jiangnan.edu.cn (W.T.); yni@jiangnan.edu.cn (Y.N.); 1022210232@stu.jiangnan.edu.cn (Y.G.);  
\* Correspondence: hanrz@jiangnan.edu.cn; Tel.: +86-510-8532-9265

**Table S1.** Strains and plasmids used in this study.

| Strains and Plasmids      | description                          |            |
|---------------------------|--------------------------------------|------------|
| <i>E. coli</i> BL21 (DE3) | host for expression plasmids         | lab stock  |
| pET-28a                   | expression vector, Km <sup>R</sup>   | lab stock  |
| pET28a- <i>BaSP</i>       | pET-28a harboring <i>BaSP</i> gene   | this study |
| pET28a- <i>CaFRK</i>      | pET-28a harboring <i>CaFRK</i> gene  | this study |
| pET28a- <i>CaF6PE</i>     | pET-28a harboring <i>CaF6PE</i> gene | this study |
| pET28a- <i>MmT6PP</i>     | pET-28a harboring <i>MmT6PP</i> gene | this study |
| pET28a- <i>DrPPK</i>      | pET-28a harboring <i>DrPPK</i> gene  | this study |

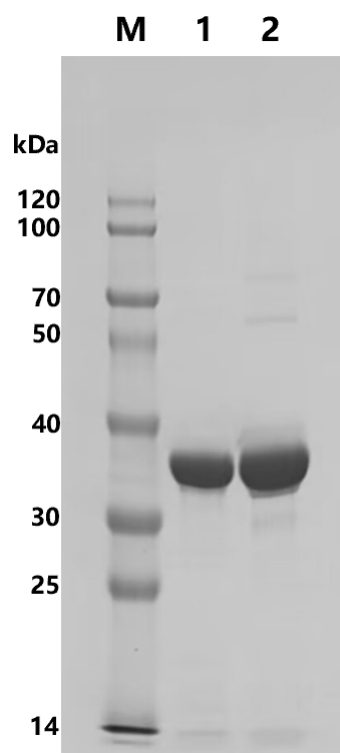

**Figure S1.** SDS-PAGE analysis of purified enzymes of PPK2. M, protein marker; line 1, *DrPPK*; line 2, *DaPPK*.

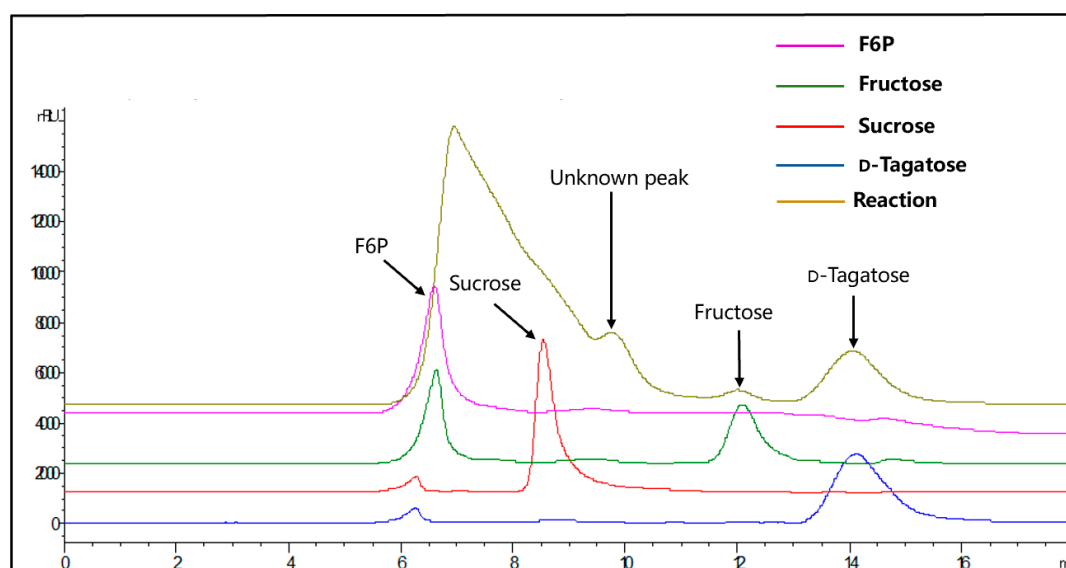

**Figure S2.** HPLC profiles of MCTS and standard substances and (by)products. **Purple**, F6P standard; **Green**, fructose standard; **Red**, sucrose standard; **Blue**, D-tagatose standard; **Brown**, reaction sample. A 1 mL mixture containing *Ba*SP (0.01 mg·mL<sup>-1</sup>), *Ca*FRK (0.02 mg·mL<sup>-1</sup>), *Ca*F6PE (0.05 mg·mL<sup>-1</sup>), *Mm*T6PP (0.2 mg·mL<sup>-1</sup>), *Dr*PPK (0.04 mg·mL<sup>-1</sup>), pH 7.5 buffer (50 mM Tris-HCl + 10 mM PBS), 10 mM sucrose, 4 mM MnCl<sub>2</sub>, and 1 mM ADP was incubated at 45 °C for 24 h. Unknown peak may include T6P.
